# Supplementary material
Source: publisher figshare collection journal article supplement (https://gsajournals.figshare.com/ndownloader/files/24030728)
Supplement: Supplementary file 1 [file 24030728]

**Supplementary Table 2.** Number of SM gene clusters identified for the three isolates of *Basidiobolus* analyzed in this report

| **Genome sequence** | **Gene model** | **SM class** | **Cluster number** | **Additional genes predicted in cluster (Protein ID)** |
| --- | --- | --- | --- | --- |
| *B .meristosporus* B9252 | N161.mRNA.1413.1 | Terpene | 1 | N161_02321;N161_02322;N161_02323;N161_02324;N161_02325;N161_02326 |
| *B .meristosporus* B9252 | N161.mRNA.1431.1 | NRPS | 2 | N161_00522;N161_00523;N161_00524 |
| *B .meristosporus* B9252 | N161.mRNA.1433.1 | NRPS-Like | 2 | N161_00522;N161_00523;N161_00524 |
| *B .meristosporus* B9252 | N161.mRNA.1485.1 | NRPS | 3 | N161_03744;N161_03745 |
| *B .meristosporus* B9252 | N161.mRNA.1486.1 | NRPS-Like | 3 | N161_03744;N161_03745 |
| *B .meristosporus* B9252 | N161.mRNA.2152.1 | NRPS | 4 | N161_10119 |
| *B .meristosporus* B9252 | N161.mRNA.3482.1 | NRPS-Like | 5 | N161_01570;N161_01571;N161_01572;N161_01573;N161_01574;N161_01575;N161_01576;N161_01577;N161_01578;N161_01579;N161_01580;N161_01581 |
| *B .meristosporus* B9252 | N161.mRNA.4115.1 | NRPS | 6 | N161_10439;N161_10440;N161_10441 |
| *B .meristosporus* B9252 | N161.mRNA.4211.1 | NRPS | 7 | N161_02960 |
| *B .meristosporus* B9252 | N161.mRNA.4324.1 | NRPS | 8 | N161_04345;N161_04346;N161_04347;N161_04348;N161_04349;N161_04350 |
| *B .meristosporus* B9252 | N161.mRNA.4477.1 | NRPS | 9 | N161_03649 |
| *B .meristosporus* B9252 | N161.mRNA.5264.1 | Terpene | 10 | N161_03756;N161_03757;N161_03758;N161_03759;N161_03760;N161_03761;N161_03762 |
| *B .meristosporus* B9252 | N161.mRNA.5262.1 | Terpene | 10 | N161_03756;N161_03757;N161_03758;N161_03759;N161_03760;N161_03761;N161_03762 |
| *B .meristosporus* B9252 | N161.mRNA.5494.1 | NRPS-Like | 11 | N161_11865;N161_11866;N161_11867 |
| *B .meristosporus* B9252 | N161.mRNA.5537.1 | NRPS-Like | 12 | N161_01252;N161_01253 |
| *B .meristosporus* B9252 | N161.mRNA.5981.1 | NRPS-Like | 13 | N161_06505;N161_06506;N161_06507;N161_06508 |
| *B .meristosporus* B9252 | N161.mRNA.6146.1 | PKS | 14 | N161_03348;N161_03349;N161_03350;N161_03351;N161_03352;N161_03353 |
| *B .meristosporus* B9252 | N161.mRNA.6846.1 | NRPS-Like | 15 | N161_00937;N161_00938;N161_00939;N161_00940;N161_00941;N161_00942;N161_00943;N161_00944;N161_00945 |
| *B .meristosporus* B9252 | N161.mRNA.6935.1 | NRPS-Like | 16 | N161_02910 |
| *B .meristosporus* B9252 | N161.mRNA.7156.1 | NRPS-Like | 17 | N161_07755 |
| *B .meristosporus* B9252 | N161.mRNA.8304.1 | NRPS | 18 | N161_00029;N161_00030;N161_00031;N161_00032;N161_00033;N161_00034 |
| *B .meristosporus* B9252 | N161.mRNA.8432.1 | NRPS | 19 | N161_08819;N161_08820;N161_08821;N161_08822;N161_08823;N161_08824;N161_08825;N161_08826;N161_08827 |
| *B .meristosporus* B9252 | N161.mRNA.8434.1 | PKS-Like | 19 | N161_08819;N161_08820;N161_08821;N161_08822;N161_08823;N161_08824;N161_08825;N161_08826;N161_08827 |
| *B .meristosporus* B9252 | N161.mRNA.9145.1 | NRPS | 20 | N161_05517 |
| *B .meristosporus* B9252 | N161.mRNA.9317.1 | NRPS | 21 | N161_10084 |
| *B .meristosporus* B9252 | N161.mRNA.9497.1 | NRPS-Like | 22 | N161_07963;N161_07964;N161_07965;N161_07966;N161_07967;N161_07968 |
| *B .meristosporus* B9252 | N161.mRNA.9639.1 | NRPS | 23 | N161_02356 |
| *B .meristosporus* B9252 | N161.mRNA.10391.1 | PKS | 24 | N161_01106;N161_01107 |
| *B .meristosporus* B9252 | N161.mRNA.11155.1 | NRPS-Like | 25 | N161_04188;N161_04189;N161_04190;N161_04191;N161_04192;N161_04193;N161_04194;N161_04195;N161_04196;N161_04197;N161_04198;N161_04199;N161_04200;N161_04201 |
| *B .meristosporus* B9252 | N161.mRNA.11155.1 | NRPS-Like | 26 | N161_04197 |
| *B .meristosporus* B9252 | N161.mRNA.11289.1 | NRPS | 27 | N161_01308 |
| *B .meristosporus* B9252 | N161.mRNA.12214.1 | Terpene | 28 | N161_10522;N161_10523;N161_10524;N161_10525;N161_10526;N161_10527 |
| *B .meristosporus* B9252 | N161.mRNA.13295.1 | NRPS-Like | 29 | N161_06649;N161_06650;N161_06651;N161_06652 |
| *B .meristosporus* B9252 | N161.mRNA.13969.1 | Terpene | 30 | N161_00991;N161_00992 |
| *B .meristosporus* B9252 | N161.mRNA.14278.1 | HYBRID | 31 | N161_09308;N161_09309;N161_09310;N161_09311;N161_09312;N161_09313;N161_09314;N161_09315 |
| *B .meristosporus* B9252 | N161.mRNA.14365.1 | Terpene | 32 | N161_10409;N161_10410;N161_10411 |
| *B .meristosporus* B9252 | N161.mRNA.12007.1 | NRPS-Like | 33 | N161_04229;N161_04230;N161_04231;N161_04232;N161_04233;N161_04234;N161_04235;N161_04236 |
| *B .meristosporus* B9252 | N161.mRNA.5862.1 | NRPS-Like | 34 | N161_03051 |
| *B .meristosporus* B9252 | N161.mRNA.8699.1 | NRPS-Like | 35 | N161_10399;N161_07977;N161_11287;N161_04081;N161_07890;N161_00310;N161_02875;N161_03816;N161_03190;N161_12282;N161_05360;N161_02320;N161_06895;N161_09821 |
| *B .meristosporus* B9252 | N161.mRNA.8700.1 | NRPS-Like | 36 | N161_08819;N161_01810;N161_05857;N161_07278;N161_08079;N161_07843;N161_05690;N161_07209;N161_01891;N161_06243;N161_01644;N161_05769;N161_11037;N161_06895;N161_09821 |
| *B .meristosporus* B9252 | N161.mRNA.204.1 | PKS-Like | 37 | N161_12043 |
| *B .meristosporus* B9252 | N161.mRNA.4846.1 | PKS-Like | 38 | N161_09808 |
| *B .meristosporus* B9252 | N161.mRNA.9939.1 | PKS-Like | 39 | N161_09808 |
| *B .meristosporus* B9252 | N161.mRNA.9973.1 | PKS-Like | 40 | N161_02595 |
| *B .meristosporus* CBS 931.73 | 366903 | NRPS | 1 | 295637;366903;366910;295640;310315;5321 |
| *B .meristosporus* CBS 931.73 | 322666 | NRPS-Like | 2 | 322664;344892;404256;310870;344895;252485;322666;296369;322667;374951 |
| *B .meristosporus* CBS 931.73 | 328337 | Terpene | 3 | 334011;311465;328337;311467;276042 |
| *B .meristosporus* CBS 931.73 | 146993 | NRPS-Like | 4 | 382072;323047;323048;311608;311609;334162;404891;146993;345979;297308;276322;297310;297311 |
| *B .meristosporus* CBS 931.73 | 387529 | NRPS | 5 | 387529;312194;277549;277552;298096;277554;334759;298099 |
| *B .meristosporus* CBS 931.73 | 278430 | Terpene | 6 | 99487;278430;99499;347625;312651;323585;323586;323587;210480;256087;312655 |
| *B .meristosporus* CBS 931.73 | 323585 | Terpene | 6 | 99487;278430;99499;347625;312651;323585;323586;323587;210480;256087;312655 |
| *B .meristosporus* CBS 931.73 | 298977 | NRPS | 7 | 298977;312902;312903;328970;348020;348021 |
| *B .meristosporus* CBS 931.73 | 368581 | NRPS | 8 | 349684;300169;368581;215133;258492;313863;280838;406759 |
| *B .meristosporus* CBS 931.73 | 349800 | NRPS | 9 | 11775;349800;349801;349802;215367;313931;313932;313933;406809;368907;313935 |
| *B .meristosporus* CBS 931.73 | 300898 | NRPS-Like | 10 | 314493;217438;314495;19557;281917;259598;281923;300898;300899;300900;300901 |
| *B .meristosporus* CBS 931.73 | 300898 | NRPS-Like | 10 | 314493;217438;314495;19557;281917;259598;281923;300898;300899;300900;300901 |
| *B .meristosporus* CBS 931.73 | 282246 | Terpene | 11 | 301086;21234;21255;282246;314665;407354;218038;301092 |
| *B .meristosporus* CBS 931.73 | 301092 | Terpene | 11 | 301086;21234;21255;282246;314665;407354;218038;301092 |
| *B .meristosporus* CBS 931.73 | 260222 | Terpene | 12 | 22761;218744;218712;22802;260217;314835;351312;260222;337205;351315 |
| *B .meristosporus* CBS 931.73 | 301341 | Terpene | 13 | 314880;314882;301338;24046;337244;301341;282611;301343 |
| *B .meristosporus* CBS 931.73 | 372159 | NPRS | 14 | 301473;24895;314994;372159;219244;372167;314995;407608;314997;182058;219234;315001;351566;315003 |
| *B .meristosporus* CBS 931.73 | 351909 | NRPS | 15 | 372749;351909 |
| *B .meristosporus* CBS 931.73 | 372749 | NRPS | 15 | 372749;351909 |
| *B .meristosporus* CBS 931.73 | 337511 | NRPS-Like | 16 | 337511;301681;329810;301683;220047 |
| *B .meristosporus* CBS 931.73 | 372991 | NRPS | 17 | 372991;154765;139122;220322;301747;301748;407790;301750;337567;315257 |
| *B .meristosporus* CBS 931.73 | 373247 | NRPS | 18 | 373247;220753;28376;220738;329867;315346;315348;324755;315350;315351;315353 |
| *B .meristosporus* CBS 931.73 | 373940 | NRPS | 19 | 373940;302148;352631;31440;283912;352634 |
| *B .meristosporus* CBS 931.73 | 221915 | NRPS-Like | 20 | 221900;221945;352795;32535;337961;221950;32530;337963;32572;315660;315661;315662;221915;261780;337969;352803;374274;352805 |
| *B .meristosporus* CBS 931.73 | 375475 | NRPS | 21 | 375475 |
| *B .meristosporus* CBS 931.73 | 338397 | NRPS | 22 | 330193;302810;223759;316123;375580;338397;353622;302814;353623;353624 |
| *B .meristosporus* CBS 931.73 | 375580 | NRPS | 22 | 330193;302810;223759;316123;375580;338397;353622;302814;353623;353624 |
| *B .meristosporus* CBS 931.73 | 375613 | NRPS | 23 | 37789;316128;37852;223771;338402;37874;284951;375613;223806;353650;302826;353651;353652 |
| *B .meristosporus* CBS 931.73 | 377413 | NRPS | 24 | 303544;377413;408976;316765;45707;303549;316769;316770;263779 |
| *B .meristosporus* CBS 931.73 | 409012 | Terpene | 25 | 316823;286132;409012;316830 |
| *B .meristosporus* CBS 931.73 | 304520 | Terpene | 26 | 330193;302810;223759;316123;375580;338397;353622;302814;353623;353624 |
| *B .meristosporus* CBS 931.73 | 229390 | Terpene | 26 | 330193;302810;223759;316123;375580;338397;353622;302814;353623;353624 |
| *B .meristosporus* CBS 931.73 | 382467 | NRPS-Like | 27 | 318559;318560;318561;340521;318563;318564;305608;357897;318565;232920;382467;357901;66822 |
| *B .meristosporus* CBS 931.73 | 340613 | NRPS-Like | 28 | 340608;305718;156797;305719;326180;340610;318645;318646;233298;289283;340613;233269 |
| *B .meristosporus* CBS 931.73 | 237744 | PKS | 29 | 306991;319740;341570;306994;237745;237740;306997;237744;237746 |
| *B .meristosporus* CBS 931.73 | 291346 | NRPS-Like | 30 | 319840;291346;238215 |
| *B .meristosporus* CBS 931.73 | 320108 | NRPS-Like | 31 | 411566;291781;320108;269502 |
| *B .meristosporus* CBS 931.73 | 387714 | NRPS-Like | 32 | 152918;239552;291892;341975;320182;291896;341977;331710;387714;360885;320185;88353 |
| *B .meristosporus* CBS 931.73 | 307892 | NRPS | 33 | 307892;307893;241197;307895;320516;241198;307898 |
| *B .meristosporus* CBS 931.73 | 292783 | PKS | 34 | 292783;320693;331891;241971;308095;361867;411992;241981 |
| *B .meristosporus* CBS 931.73 | 343011 | NRPS | 35 | 309006;321539;343011 |
| *B .meristosporus* CBS 931.73 | 363930 | NRPS | 36 | 363925;363926;309098;309099;309100;309101;363930;363931 |
| *B .meristosporus* CBS 931.73 | 290138 | PKS | 37 | 290138 |
| *B .meristosporus* CBS 931.73 | 207695 | PKS-Like | 38 | 207695 |
| *B. heterosporus* B8920 | N168_02885 | NRPS | 1 | N168_02882;N168_02883;N168_02884;N168_02885;N168_02886;N168_02887;N168_02888;N168_02889;N168_02890 |
| *B. heterosporus* B8920 | N168_04958 | PKS | 2 | N168_04958;N168_04959;N168_04960;N168_04961;N168_04962;N168_04963;N168_04964;N168_04965 |
| *B. heterosporus* B8920 | N168_00992 | NRPS | 3 | N168_00992 |
| *B. heterosporus* B8920 | N168_00027 | Terpene | 4 | N168_05324 |
| *B. heterosporus* B8920 | N168_05324 | NRPS-Like | 5 | N168_00025;N168_00026;N168_00027;N168_00028;N168_00029 |
| *B. heterosporus* B8920 | N168_07733 | NRPS | 6 | N168_07733 |
| *B. heterosporus* B8920 | N168_08644 | Terpene | 7 | N168_08640;N168_08641;N168_08642;N168_08643;N168_08644;N168_08645;N168_08646;N168_08647 |
| *B. heterosporus* B8920 | N168_05934 | NRPS | 8 | N168_05932;N168_05933;N168_05934 |
| *B. heterosporus* B8920 | N168_07140 | NRPS | 9 | N168_07138;N168_07139;N168_07140 |
| *B. heterosporus* B8920 | N168_02949 | NRPS-Like | 10 | N168_02949;N168_02950;N168_02951 |
| *B. heterosporus* B8920 | N168_03036 | NRPS-Like | 11 | N168_03036 |
| *B. heterosporus* B8920 | N168_04239 | NRPS-Like | 12 | N168_04234;N168_04235;N168_04236;N168_04237;N168_04238;N168_04239 |
| *B. heterosporus* B8920 | N168_06479 | NRPS | 13 | N168_06474;N168_06475;N168_06476;N168_06477;N168_06478;N168_06479 |
| *B. heterosporus* B8920 | N168_00034 | NRPS | 14 | N168_00034;N168_00035 |
| *B. heterosporus* B8920 | N168_00176 | NRPS | 15 | N168_00168;N168_00169;N168_00170;N168_00171;N168_00172;N168_00173;N168_00174;N168_00175;N168_00176 |
| *B. heterosporus* B8920 | N168_04712 | NRPS-Like | 16 | N168_04712 |
| *B. heterosporus* B8920 | N168_00255 | NRPS-Like | 17 | N168_00250;N168_00251;N168_00252;N168_00253;N168_00254;N168_00255;N168_00256 |
| *B. heterosporus* B8920 | N168_08721 | NRPS | 18 | N168_08721 |
| *B. heterosporus* B8920 | N168_05966 | NRPS | 19 | N168_05966;N168_05967 |
| *B. heterosporus* B8920 | N168_04564 | Terpene | 20 | N168_04560;N168_04561;N168_04562;N168_04563;N168_04564;N168_04565;N168_04566 |
| *B. heterosporus* B8920 | N168_00768 | NRPS-Like | 21 | N168_00759;N168_00760;N168_00761;N168_00762;N168_00763;N168_00764;N168_00765;N168_00766;N168_00767;N168_00768;N168_00769;N168_00770 |
| *B. heterosporus* B8920 | N168_03279 | Terpene | 22 | N168_03276;N168_03277;N168_03278;N168_03279;N168_03280;N168_03281;N168_03282;N168_03283 |
| *B. heterosporus* B8920 | N168_08580 | NRPS-Like | 23 | N168_08580 |
